# Supplementary material
Source: PubMed Central journal article supplement (PMC5479472)
Supplement: NIHMS72880-supplement-Supplementary_Material.pdf [file NIHMS72880-supplement-Supplementary_Material.pdf]

# Supplementary Material

## Ligand induced activation of human TRPM2 requires the terminal ribose of ADPR and involves Arg 1433 and Tyr 1349

Ralf Fliegert<sup>1</sup>, Joanna M. Watt<sup>2,3</sup>, Anja Schöbel<sup>1</sup>, Monika D. Rozewitz<sup>1</sup>, Christelle Moreau<sup>2</sup>, Tanja Kirchberger<sup>1</sup>, Mark P. Thomas<sup>2</sup>, Wiebke Sick<sup>1</sup>, Andrea C. Araujo<sup>1</sup>, Angelika Harneit<sup>1</sup>, Barry V. L. Potter<sup>2,3</sup>, and Andreas H. Guse<sup>1</sup>

<sup>1</sup>The Calcium Signalling Group, Department of Biochemistry and Molecular Cell Biology, University Medical Center Hamburg-Eppendorf, Martinistrasse 52, 20246 Hamburg, Germany

<sup>2</sup>Wolfson Laboratory of Medicinal Chemistry, Department of Pharmacy and Pharmacology, University of Bath, Bath, BA2 7AY, UK

<sup>3</sup>Medicinal Chemistry & Drug Discovery, Department of Pharmacology, University of Oxford, Mansfield Road, Oxford, OX1 3QT, UK

**Supplementary Figure S1.** Synthesis of methyl-ADP and <sup>1</sup>H-NMR data. p2

**Supplementary Figure S2.** Synthesis of THF-ADP and <sup>1</sup>H-NMR data. p3

**Supplementary Figure S3.** Synthesis and purification of  $\alpha$ -1''-O-methyl-ADPR and  $\beta$ -1''-O-methyl-ADPR and chromatographic data. p4

**Supplementary Figure S4.** <sup>1</sup>H-NMR data for  $\alpha$ -1''-O-methyl-ADPR and  $\beta$ -1''-O-methyl-ADPR. p5

**Supplementary Table S1.** Possible templates for modelling ADPR into the TRPM2 Nudix domain binding site. p6

**Supplementary Table S2.** Primers used for QuikChange mutagenesis and sequencing of the coding sequence for TRPM2. p7

## Synthesis of methyl-ADP

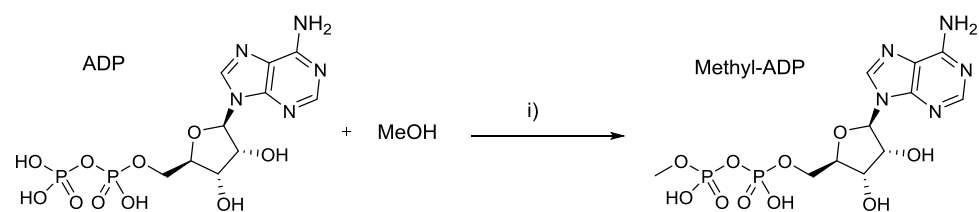

i) *N,N*-Dicyclohexylcarbodiimide (DCC),

CMF-071

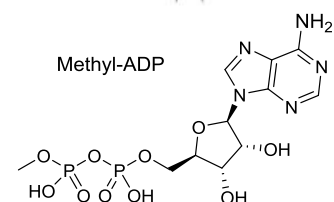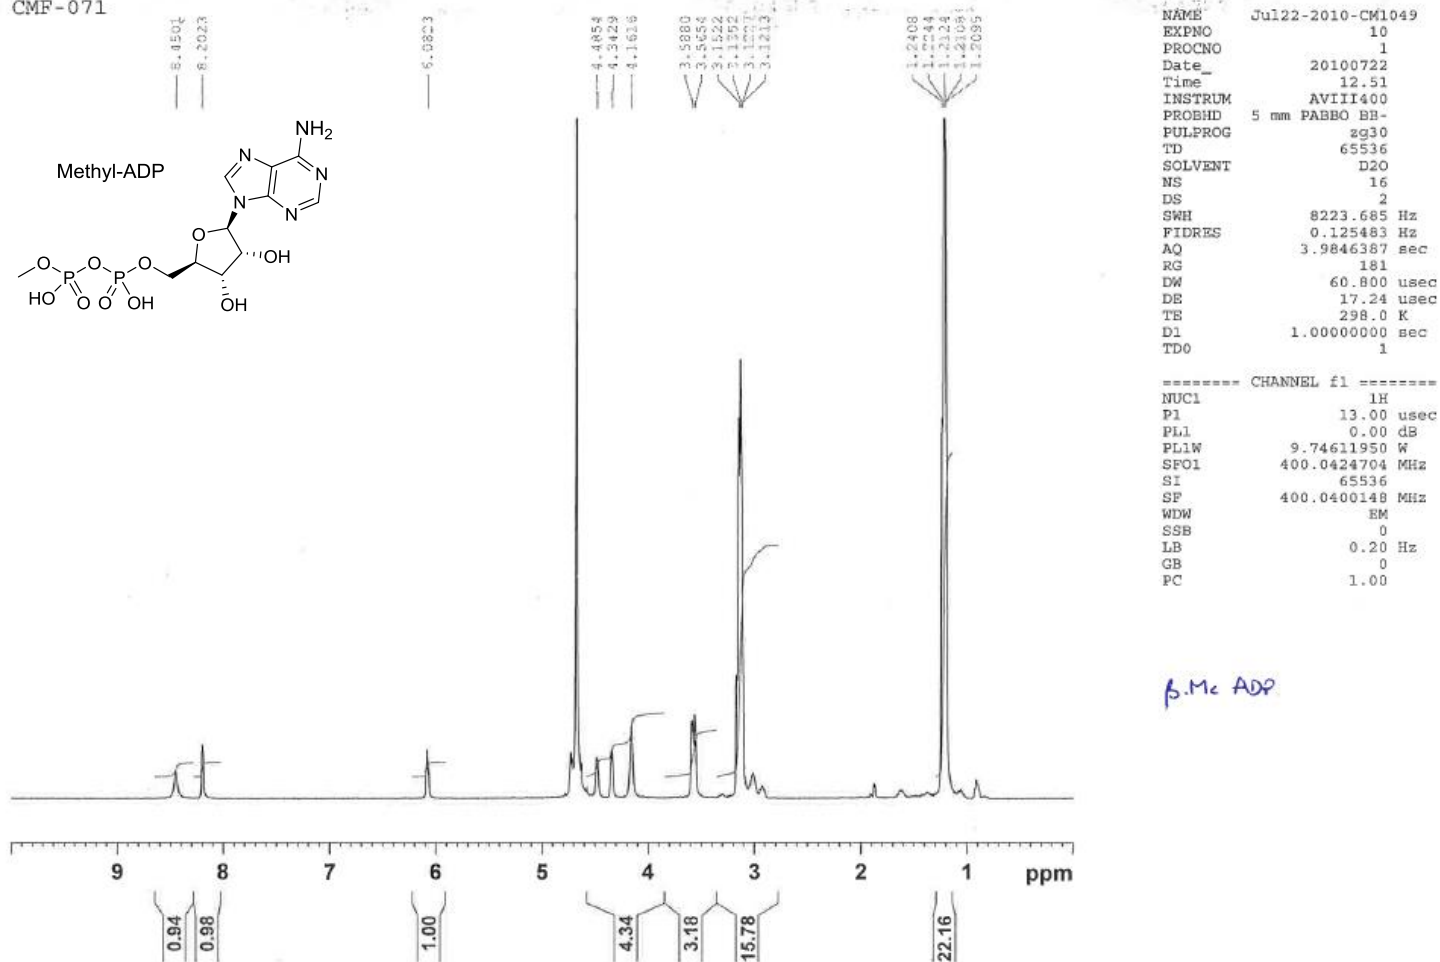

Supplementary Figure S1. Synthesis of methyl-ADP and <sup>1</sup>H-NMR data.

## Synthesis of THF-ADP

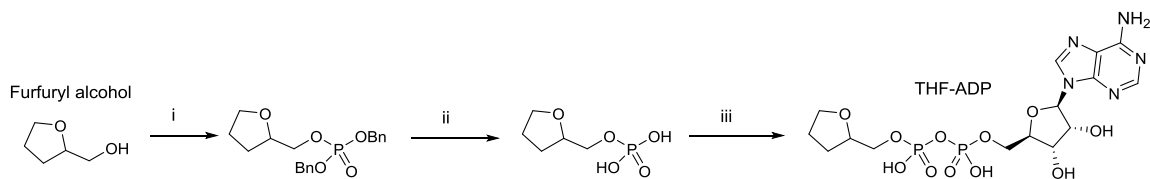

i) a)  $(iPr)_2NP(OBn)_2$ , 1-*H*-tetrazole, DCM b) mCPBA; ii)  $Pd(OH)_2/C$ , cyclohexene, MeOH-H<sub>2</sub>O (10:1 v/v); iii) AMP-morpholidate, MgSO<sub>4</sub>, 0.2 M MnCl<sub>2</sub> in formamide

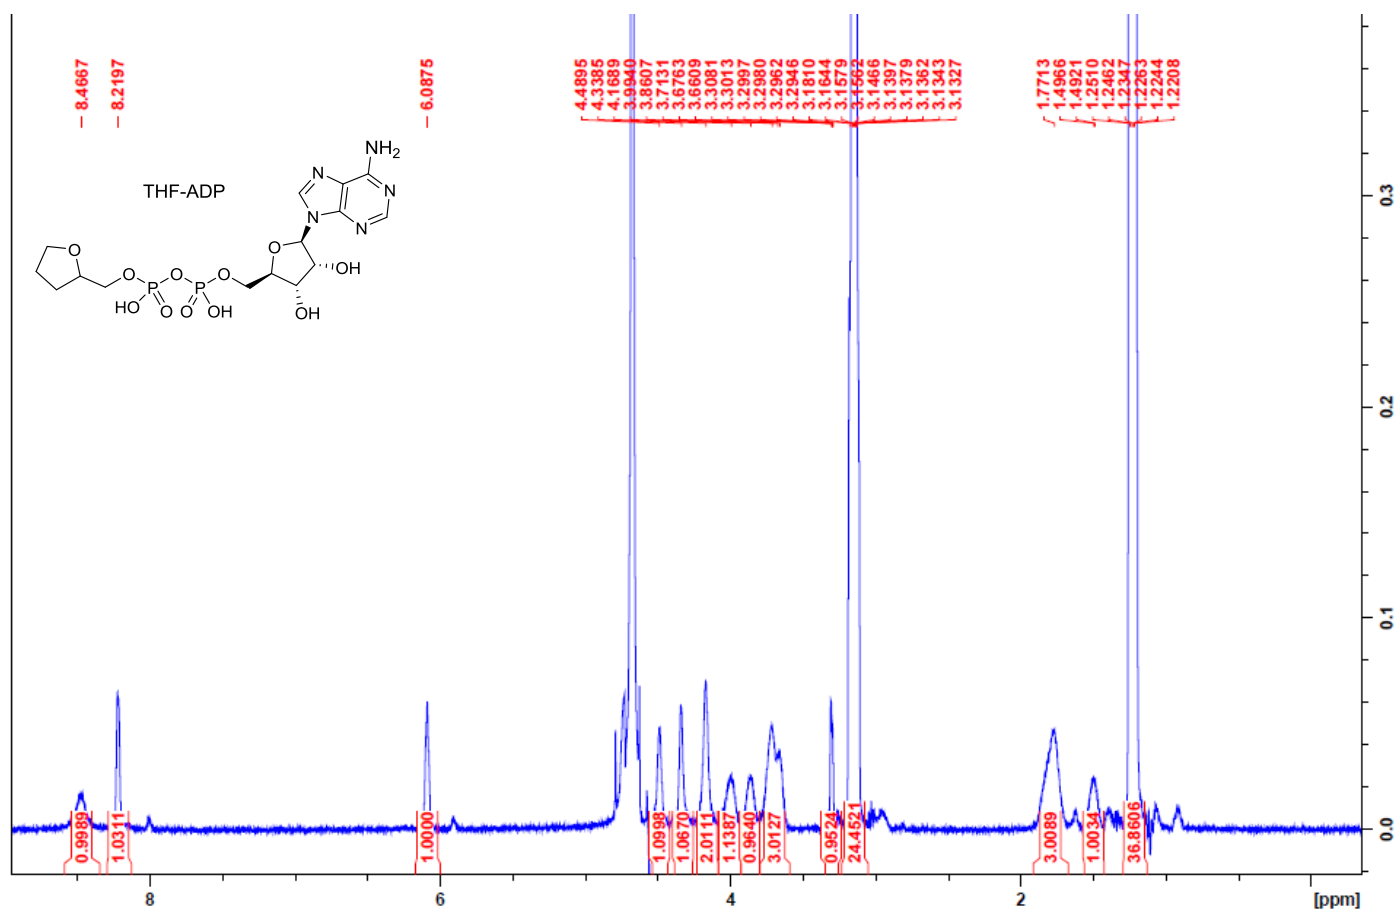

Supplementary Figure S2. Synthesis of THF-ADP and <sup>1</sup>H-NMR data.

## Synthesis of $\alpha$ - and $\beta$ -1''-O-methyl-ADPR

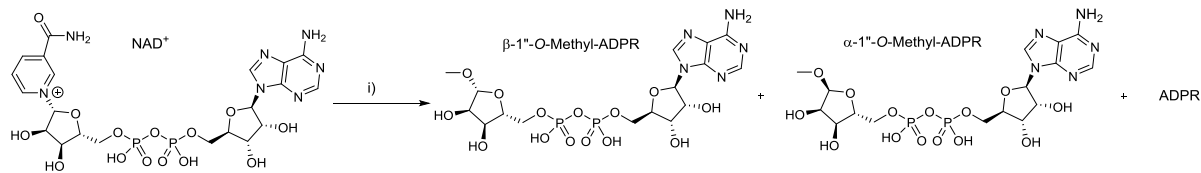

i) MeOH-Na<sub>2</sub>HPO<sub>4</sub> (0.05 M, aq.) (1:2 v/v, 3mL), 60 °C

HPLC of crude mixture containing  $\alpha$ -1''-O-methyl-ADPR,  $\beta$ -1''-O-methyl-ADPR and ADPR.

| SAMPLE INFORMATION |                    |                     |                               |
|--------------------|--------------------|---------------------|-------------------------------|
| Sample Name:       | JMS 1077 NMR       | Acquired By:        | Joanna                        |
| Sample Type:       | Unknown            | Date Acquired:      | 10/02/2015 1:25:55 PM         |
| Vial:              | 10                 | Acq. Method Set:    | RP18 LC                       |
| Injection #:       | 1                  | Date Processed:     | 07/09/2016 2:51:41 PM         |
| Injection Volume:  | 10.00 ul           | Processing Method:  | Methyl Tiazo Riboside Phospat |
| Run Time:          | 20.0 Minutes       | Channel Name:       | WVInCh1                       |
| Sample Set Name:   | JMS 1077 isocratic | Proc. Chnl. Descr.: | PDA 259.1 nm                  |

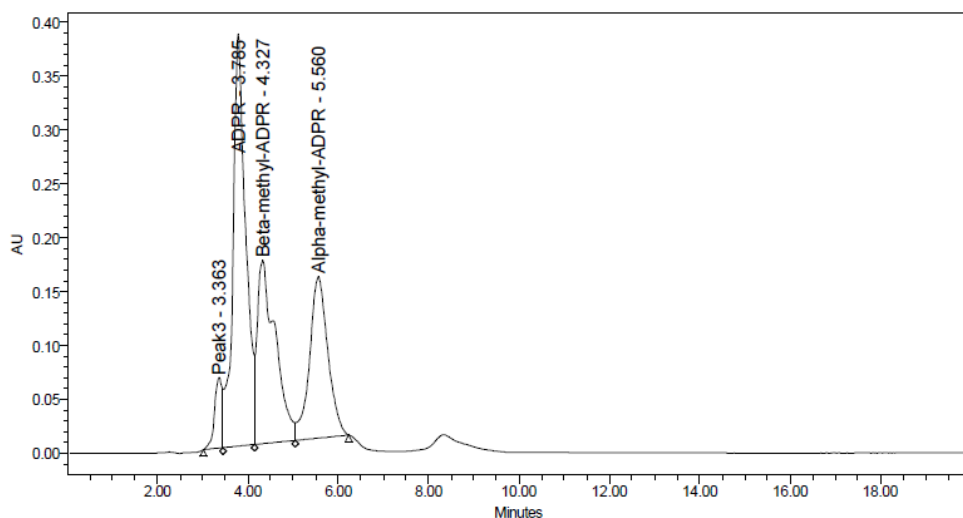

Separation of the desired products after semi-preparative HPLC:

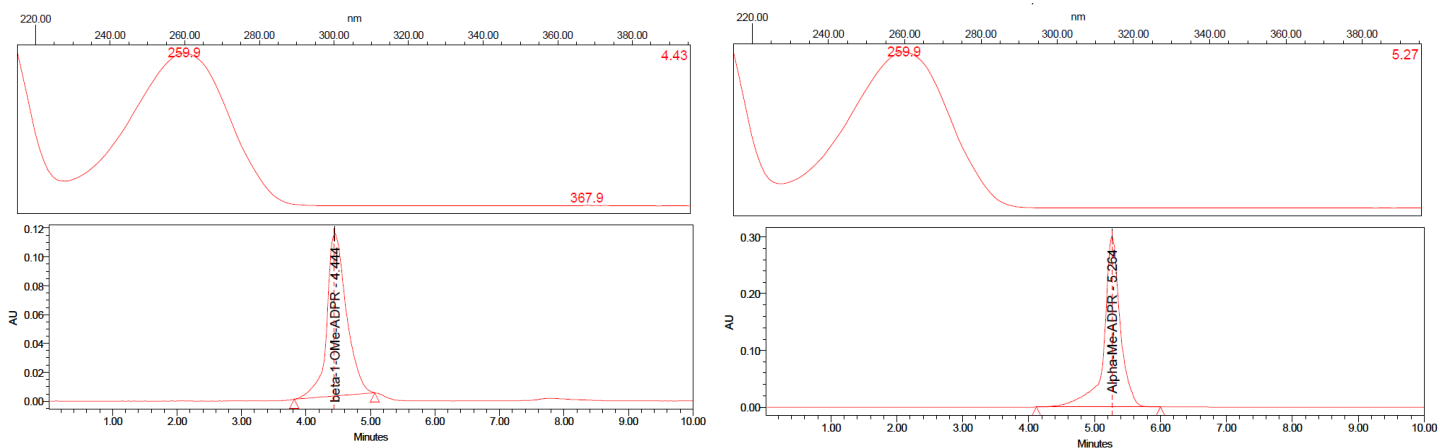

| PDA Result Table |                 |       |                   |                       |             |                        |                  |                      |                |
|------------------|-----------------|-------|-------------------|-----------------------|-------------|------------------------|------------------|----------------------|----------------|
| Name             | RT              | Area  | Purity (#1) Angle | Purity (#1) Threshold | Purity Flag | Match (#1) Spect. Name | Match (#1) Angle | Match (#1) Threshold | PDA Match Flag |
| 1                | beta-1-OMe-ADPR | 4.444 | 2381448           |                       | No          |                        |                  |                      | No             |
| 2                | Alpha-Me-ADPR   | 5.264 |                   |                       | No          |                        |                  |                      | No             |

| PDA Result Table |               |       |                   |                       |             |                        |                  |                      |                |
|------------------|---------------|-------|-------------------|-----------------------|-------------|------------------------|------------------|----------------------|----------------|
| Name             | RT            | Area  | Purity (#1) Angle | Purity (#1) Threshold | Purity Flag | Match (#1) Spect. Name | Match (#1) Angle | Match (#1) Threshold | PDA Match Flag |
| 1                | Alpha-Me-ADPR | 5.264 | 5188645           |                       | No          |                        |                  |                      | No             |

**Supplementary Figure S3.** Synthesis and separation of  $\alpha$ -1''-O-methyl-ADPR and  $\beta$ -1''-O-methyl-ADPR and chromatographic data.

JMS1024HPLC

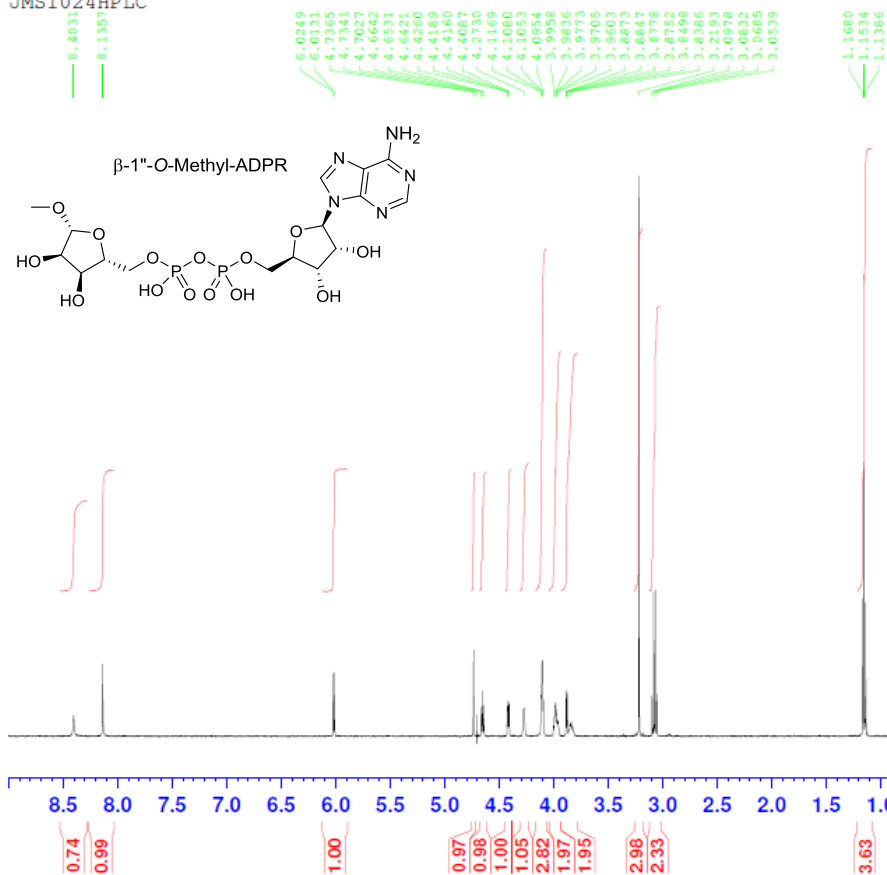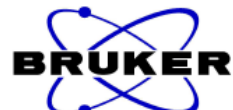

```

NAME      JMS1024HPLC
EXPNO     26
PROCNO    1
Date_     20140905
Time      9.05
INSTRUM   spect
PROBHD    5 mm PABBO BB-
PULPROG   ledpppg2s1d
TD        65536
SOLVENT   D2O
NS         16
DS         2
SWH        10330.578 Hz
FIDRES     0.157632 Hz
AQ         3.1719923 sec
RG         161
DW         48.400 usec
DE         9.73 usec
TE         295.2 K
D1         4.00000000 sec
D16        0.00020000 sec
D20        0.05000000 sec
D21        0.00500000 sec
TD0        1
    
```

```

----- CHANNEL f1 -----
NUC1      1H
P1        10.00 usec
P2        20.00 usec
PL1       -0.12 dB
PL1W      19.35150909 W
SFO1      500.1330885 MHz
    
```

```

----- GRADIENT CHANNEL -----
GPNAM6    sine.100
GPNAM7    sine.100
GPNAM8    sine.100
GPZ6      95.00 %
GPZ7      -17.13 %
GPZ8      -13.17 %
P19       600.00 usec
P30       2000.00 usec
SI        32768
SF        500.1300000 MHz
WDW       EM
SSB       0
LB        0.30 Hz
GB        0
PC        1.00
    
```

JMS1077 Methyl 1 alpha GF HPLC

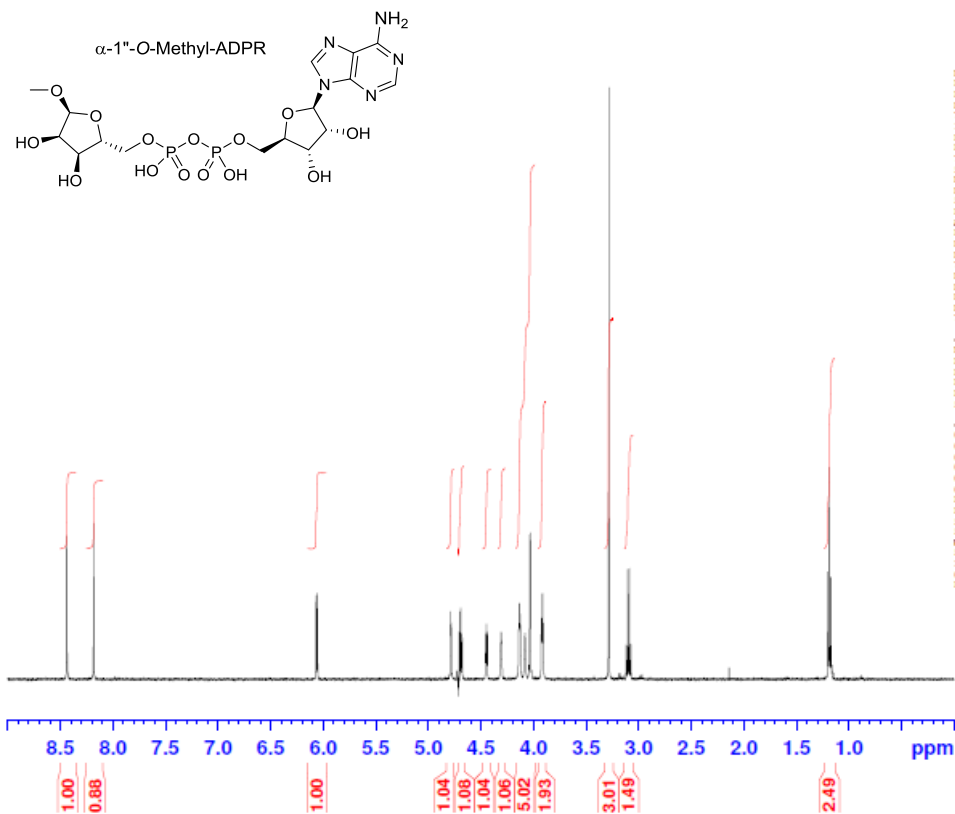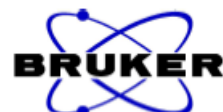

```

NAME      JMS1077 Methyl 1 alpha GF HPLC
EXPNO     10
PROCNO    1
Date_     20150216
Time      15.28
INSTRUM   spect
PROBHD    5 mm PABBO BB-
PULPROG   ledpppg2s1d
TD        65536
SOLVENT   D2O
NS         112
DS         2
SWH        10330.578 Hz
FIDRES     0.157632 Hz
AQ         3.1719923 sec
RG         362
DW         48.400 usec
DE         9.73 usec
TE         295.2 K
D1         4.00000000 sec
D16        0.00020000 sec
D20        0.05000000 sec
D21        0.00500000 sec
TD0        1
    
```

```

----- CHANNEL f1 -----
NUC1      1H
P1        10.00 usec
P2        20.00 usec
PL1       -0.12 dB
PL1W      19.35150909 W
SFO1      500.1330885 MHz
    
```

```

----- GRADIENT CHANNEL -----
GPNAM6    sine.100
GPNAM7    sine.100
GPNAM8    sine.100
GPZ6      95.00 %
GPZ7      -17.13 %
GPZ8      -13.17 %
P19       600.00 usec
P30       2000.00 usec
SI        32768
SF        500.1300000 MHz
WDW       EM
SSB       0
LB        0.30 Hz
GB        0
PC        1.00
    
```

Supplementary Figure S4. <sup>1</sup>H-NMR data for α-1''-O-methyl-ADPR and β-1''-O-methyl-ADPR.

| <b>PDB Structure</b> | <b>Species</b>                    | <b>Protein</b>                   | <b>Reference</b> |
|----------------------|-----------------------------------|----------------------------------|------------------|
| 1G9Q                 | <i>Escherichia coli</i>           | ADPRase                          | [18]             |
| 1MK1                 | <i>Mycobacterium tuberculosis</i> | ADPRase                          | [19]             |
| 1V8L                 | <i>Thermus thermophilus</i>       | ADPRase                          | [20]             |
| 2QJO                 | <i>Synechocystis</i> sp. PCC6803  | NMN<br>adenyltransferase/ADPRase | [25]             |
| 3GZ8                 | <i>Shewanella oneidensis</i>      | Transcriptional Regulator        | [28]             |

**Supplementary Table S1.** Possible templates for modelling ADPR into the TRPM2 Nudix domain binding site.

### Mutagenesis primers

|            |                                    |
|------------|------------------------------------|
| T1347V for | TTCGGACCCAACCACGTGCTGTACCCCATGGTC  |
| T1347V rev | GACCATGGGGTACAGCACGTGGTTGGGTCCGAA  |
| Y1349F for | CCCAACCACACGCTGTTCCCATGGTCACGCGG   |
| Y1349F rev | CCGCGTGACCATGGGGAACAGCGTGTGGTTGGG  |
| L1381I for | GTGGTGAAGCTCCCTATCTCCGAGCACTGGGCC  |
| L1381I rev | GGCCCAGTGCTCGGAGATAGGGAGCTTCACCAC  |
| R1433M for | TACATGGATGACCCGATGAACACGGACAATGCC  |
| R1433M rev | GGCATTGTCCGTGTTTCATCGGGTCATCCATGTA |
| Y1485F for | CGCATCCCCTCTTCGCGAACCACAAGACC      |
| Y1485F rev | GGTCTTGTGGTTCGCGAAGAGTGGGATGCG     |

### Sequencing primers

|          |                        |
|----------|------------------------|
| CMVfor   | CGCAAATGGGCGGTAGGCGTG  |
| TRPM2.5  | GTCATCACCATCGGAGTCGC   |
| TRPM2.7  | CACCTTGCTCTACCTGTACGA  |
| TRPM2.9  | CTCTGCCTGTTTCGCCTACGTG |
| TRPM2.11 | CTGCAGCTCTTCATCAAGAGG  |
| TRPM2.13 | CAGGCCGGGTTGCCCTGAAC   |
| TRPM2.15 | GGGAGACACCCTGGAGCCAC   |

**Supplementary Table S2.** Primers used for QuikChange mutagenesis and sequencing of the coding sequence for TRPM2
